# Supplementary material for: Binpairs: Utilization of Illumina Paired-End Information for Improving Efficiency of Taxonomic Binning of Metagenomic Sequences
Source: PubMed Central journal article supplement (PMC4281075; doi:10.1371/journal.pone.0114814), 2014-12-31
Supplement: pone.0114814.s001.pdf [file pone.0114814.s001.pdf]

**Figure S1:** Evaluation of the 'Binpairs' strategy for a real metagenomic dataset

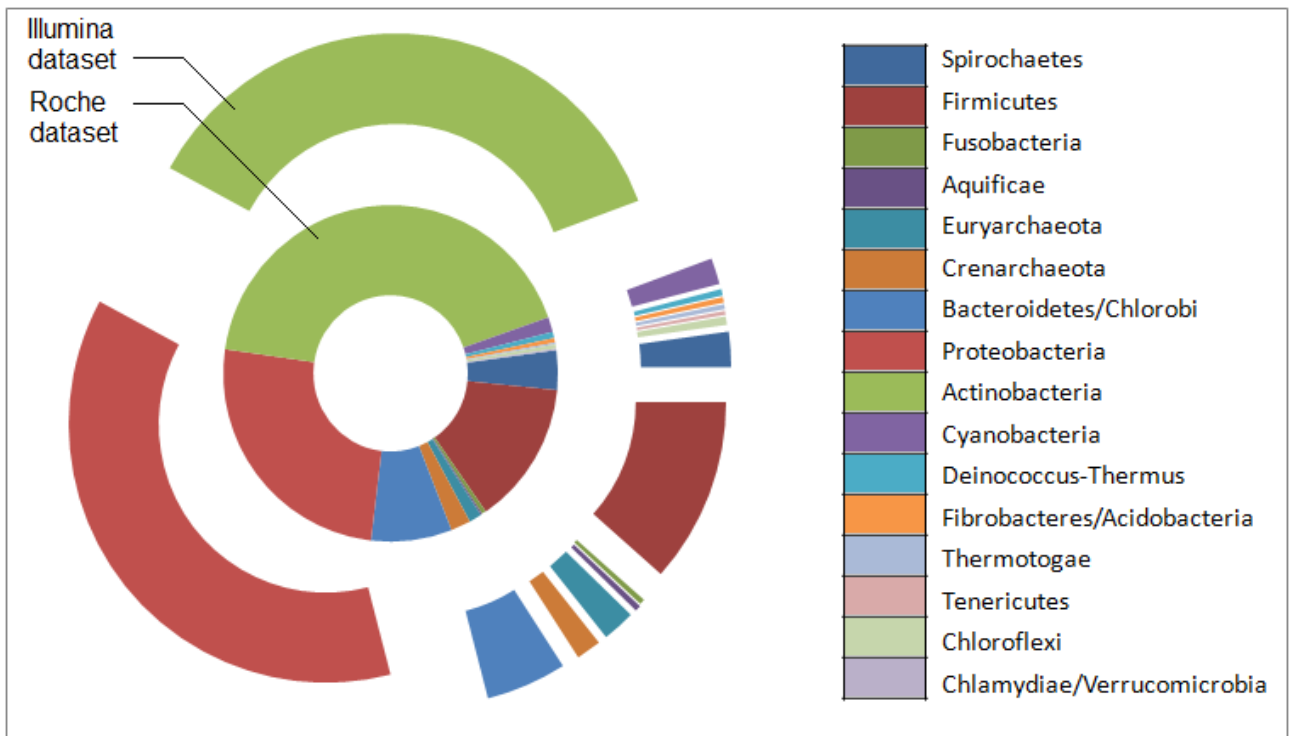

Comparison of binning results of the Oral metagenome dataset. The 'Roche' reads (~400 bp in length) constituting this metagenome were binned with SPHINX. Equivalent volume of simulated 'Illumina' mate-paired reads (see Methods) were binned using 'Binpairs' strategy SII in combination with SPHINX.
