# Supplementary material for: Binpairs: Utilization of Illumina Paired-End Information for Improving Efficiency of Taxonomic Binning of Metagenomic Sequences
Source: PubMed Central journal article supplement (PMC4281075; doi:10.1371/journal.pone.0114814), 2014-12-31
Supplement: pone.0114814.s002.pdf [file pone.0114814.s002.pdf]

**Table S1:** List of the 20 organisms used for constructing simulated test data sets. For each test organism, the phylogenetic similarity status with respect genomic database (comprising of 952 complete microbial species) are also presented.

| <b>Organism name</b>                 | <b>Nearest taxonomic relative in database</b> |
|--------------------------------------|-----------------------------------------------|
| Caldisericum exile AZM16c01          | at Phylum level                               |
| Coriobacterium glomerans PW2         | at Order level                                |
| Marivirga tractuosa DSM 4126         | at Family level                               |
| Oscillibacter valericigenes Sjm18-20 | at Family level                               |
| Fluviicola taffensis DSM 16823       | at Family level                               |
| Gardnerella vaginalis HMP9231        | at Genus level                                |
| Halomonas elonga DSM 2581            | at Genus level                                |
| Sulfuricurvum kujiense DSM 16994     | at Genus level                                |
| Dickeya dadantii 3937                | at Genus level                                |
| Helicobacter mustelae 12198          | at Species level                              |
| Slackia heliotrinireducens DSM 20476 | at Species level                              |
| Sulfurimonas autotrophica DSM 16294  | at Species level                              |
| Thermus oshimai JL-2                 | at Species level                              |
| Arthrobacter arilaitensis Re117      | at Species level                              |
| Pseudomonas aeruginosa NCGM2.S1      | at Strain level                               |
| Akkermansia muciniphila ATCC BAA-835 | included in database                          |
| Candidus Sulcia muelleri SMDSEM      | included in database                          |
| Desulfobacca acetoxidans DSM 11109   | included in database                          |
| Serratia proteamaculans 568          | included in database                          |
| Xylella fastidiosa M12               | included in database                          |
