# Supplementary material for: Binpairs: Utilization of Illumina Paired-End Information for Improving Efficiency of Taxonomic Binning of Metagenomic Sequences
Source: PubMed Central journal article supplement (PMC4281075; doi:10.1371/journal.pone.0114814), 2014-12-31
Supplement: pone.0114814.s003.pdf [file pone.0114814.s003.pdf]

**Table S2:** Time taken by different binning methods for taxonomic assignment of reads constituting the simulated 'Roche' and 'Illumina short-clones' datasets.

| Method            | Total time taken for taxonomic assignments (in mins) * |                                 |
|-------------------|--------------------------------------------------------|---------------------------------|
|                   | Roche Dataset                                          | Illumina 'short-clones' Dataset |
| Megan             | 1292                                                   | 1060                            |
| Megan-Paired      | -                                                      | 1145                            |
| Megan + SI        | -                                                      | 1063                            |
| Discribinate      | 1296                                                   | 1061                            |
| Discribinate + SI | -                                                      | 1064                            |
| Sort-items        | 1352                                                   | 1080                            |
| Sort-items + SI   | -                                                      | 1083                            |
| Sphinx            | 68                                                     | 40                              |
| Sphinx + SI       | -                                                      | 42                              |
| Twarit            | 16                                                     | 12                              |
| Twarit + SI       | -                                                      | 15                              |
| Indus             | 64                                                     | 36                              |
| Indus + SI        | -                                                      | 39                              |

\* Processing times of strategies SI, SII, SIII and SIV are equivalent. On a similar note, the processing time required for the 'short clones' and the 'long clones' dataset are also equivalent.
